# Supplementary material for: Aurora Kinase B Expression, Its Regulation and Therapeutic Targeting in Human Retinoblastoma
Source: PubMed Central journal article supplement — Invest Ophthalmol Vis Sci. 2021 Mar 11;62(3):16. doi: 10.1167/iovs.62.3.16 (PMC7960835; doi:10.1167/iovs.62.3.16), 2021-03-11
Supplement: iovs-62-3-16_s001.pdf [file iovs-62-3-16_s001.pdf]

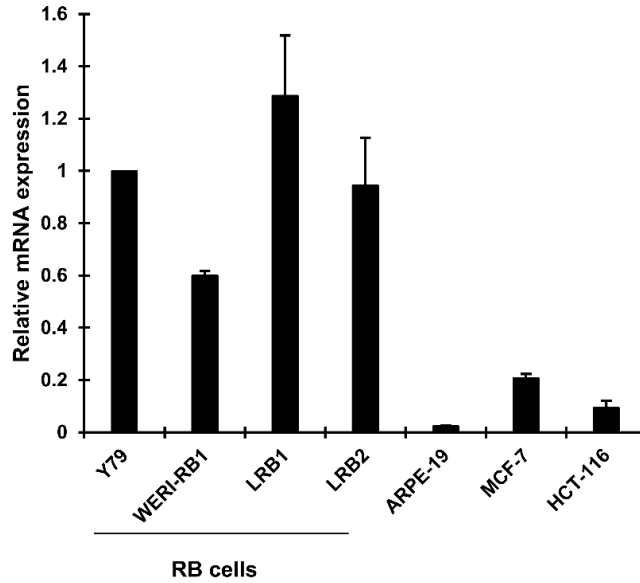

**Fig. S1:** Relative mRNA expression of AURKB in different cell lines. Y79, WERI-RB1, LRB1 and LRB2 – RB cells; ARPE-19 - human retinal pigment epithelial cell line; MCF-7 – human breast cancer cell line; HCT-116 – human colon cancer cell line. The error bars represent standard error of mean.

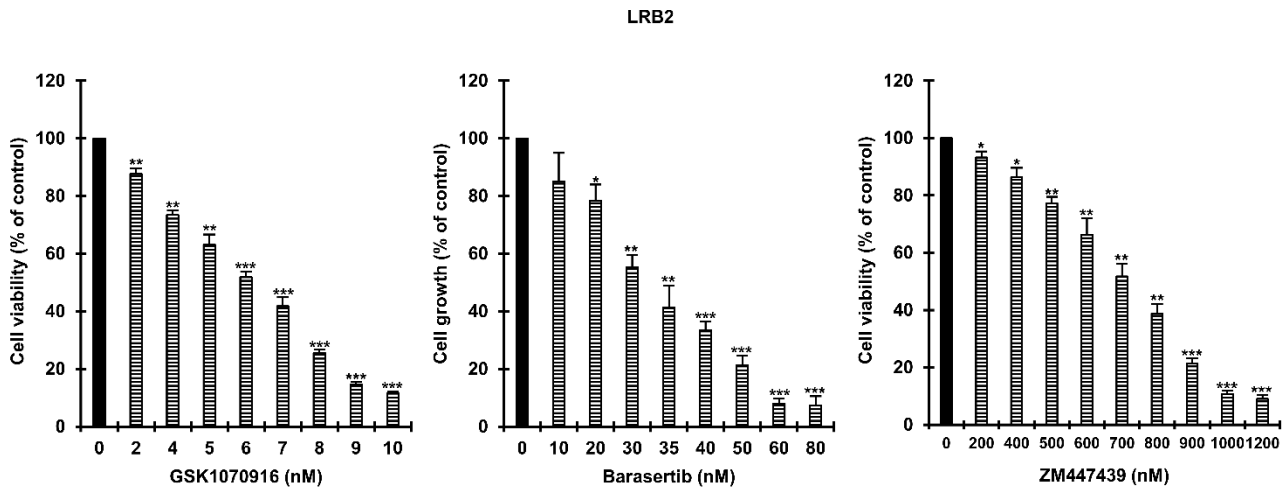

**Fig. S2:** Dose-dependent decrease in cell viability in LRB2 cells upon treatment with AURKB inhibitors. The error bars indicate standard deviation (\* $p < 0.05$ , \*\* $p < 0.01$ , \*\*\* $p < 0.001$  determined by student's t-test).

| Sl. No. | MYCN binding motif and position | Forward primer (5' to 3') | Reverse Primer (5' to 3') |
|---------|---------------------------------|---------------------------|---------------------------|
| 1.      | -1698 CATTG -1693               | CCTTGCCCTATACATCTTTTCATC  | GGGAATCAGTTTCTTGCTCAGA    |
| 2.      | -1383 CACCTG -1378              | CTCACGCCTGTAATCCAAG       | AGAGACGGGGTTTCATCAC       |
| 3.      | -1310 CACATG -1305              | CGTGGTCACATGCACCTATAA     | CCAGGGTGCAACTGATTCTC      |
| 4.      | -1069 CAGGTG -1064              | TTGGGGTTGTCAGCAACAGAA     | TTAGGGGACCACCTGTCTCTC     |
| 5.      | -462 CACCTG -457                | GGATCACCTGAGGACAGGAGT     | TAGAGACGGGTTTTCGCTGT      |
| 6.      | Negative control                | CTCTGCCTCCCAGGATTACA      | AATGAGGAAACCCCTGTCTGT     |

**Table S1:** List of primers used for ChIP-PCR analysis

| Cells | Inhibitor  | IC50 (nM) |
|-------|------------|-----------|
| Y79   | GSK1070916 | 17.89     |
|       | Barasertib | 39.38     |
|       | ZM447439   | 845.27    |
| LRB1  | GSK1070916 | 5.97      |
|       | Barasertib | 38.41     |
|       | ZM447439   | 641.47    |
| LRB2  | GSK1070916 | 5.88      |
|       | Barasertib | 32.39     |
|       | ZM447439   | 680.27    |

**Table S2:** IC50 concentrations of different AURKB inhibitors

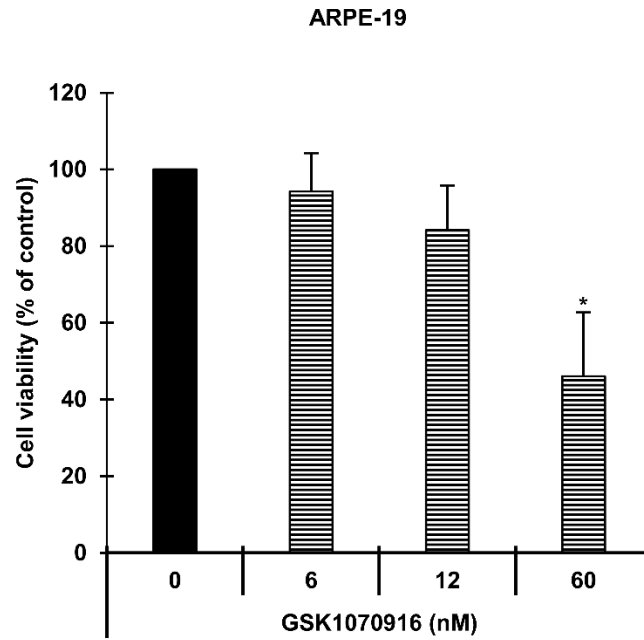

**Fig. S3:** Cell viability of ARPE 19 cells in response to AURKB inhibitor, GSK1070916. The error bars indicate standard deviation (\* $p < 0.05$  determined by student's t-test).

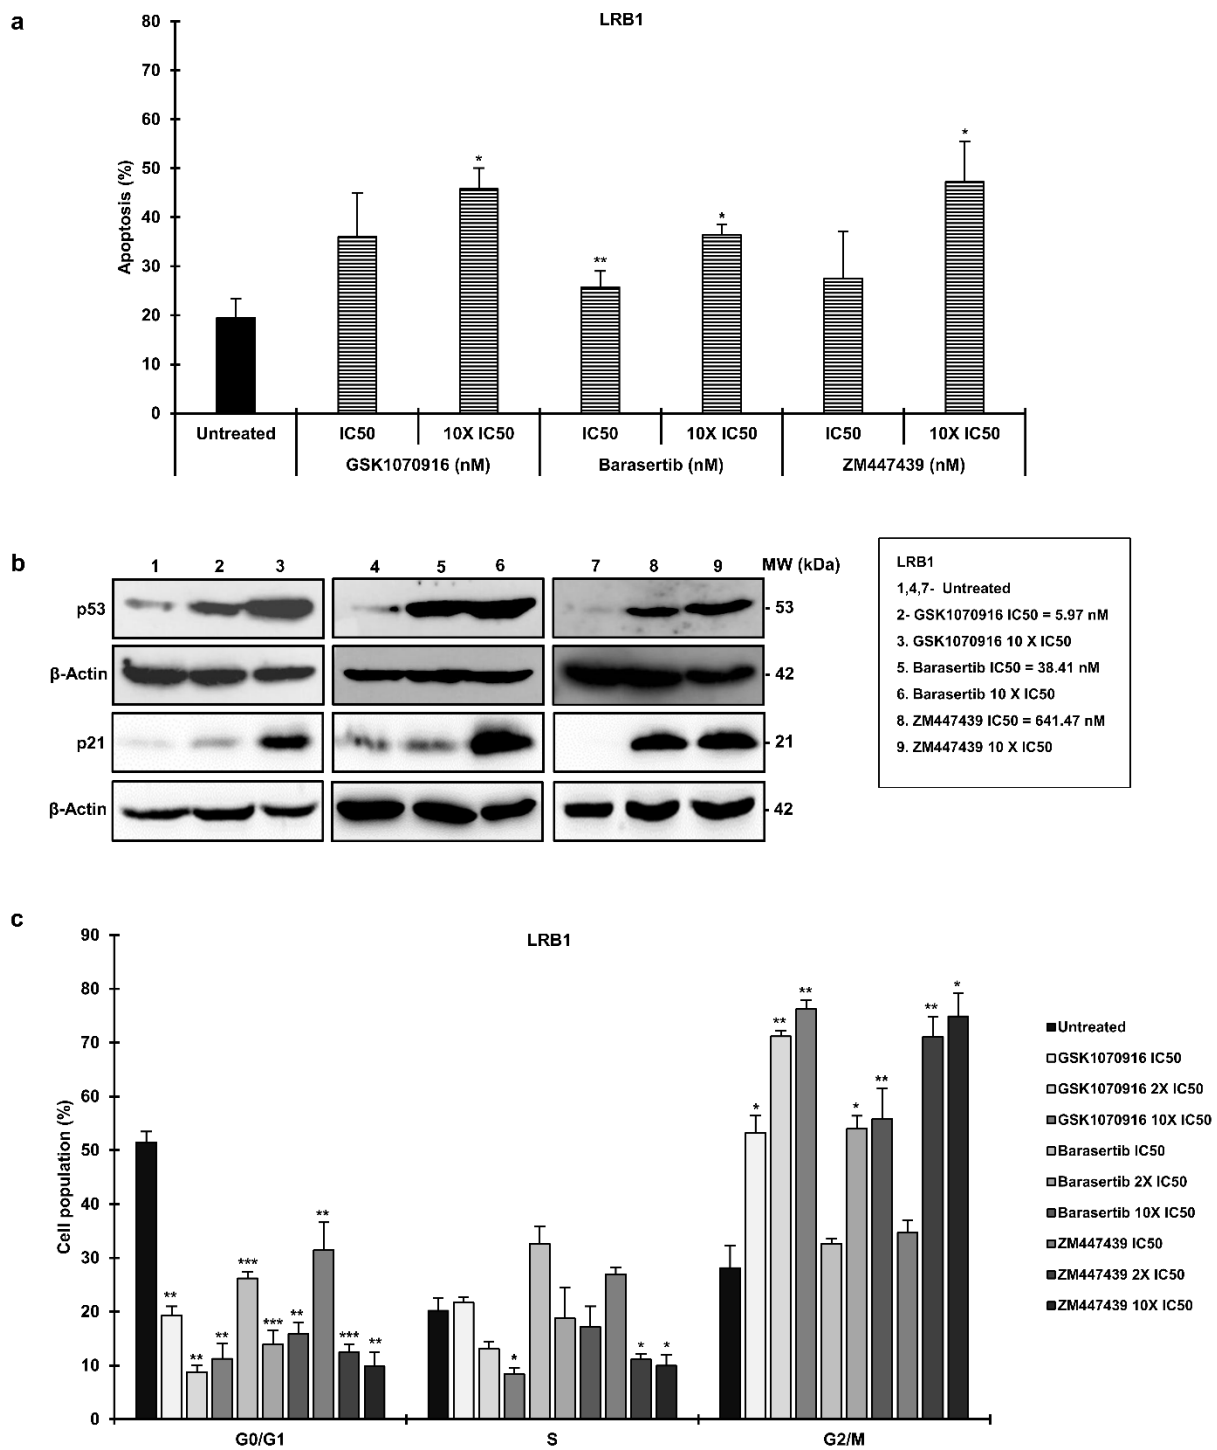

**Fig. S4:** Changes in **a.** apoptosis, **b.** p53 and p21 protein levels and **c.** cell cycle distribution in LRB1 cells upon AURKB inhibition. The error bars represent standard error of mean (\* $p < 0.05$ , \*\* $p < 0.01$ , \*\*\* $p < 0.001$  determined by student's t-test)
